# Supplementary material
Source: PubMed Central journal article supplement (PMC8981103)
Supplement: NIHPP2021.11.10.21266139V3-supplement-1.pdf [file NIHPP2021.11.10.21266139V3-supplement-1.pdf]

## Supplemental Information

Table S1: Parameters used in the model.

| Parameter                                                                   | Distribution (mean, SD) | Reference    |
|-----------------------------------------------------------------------------|-------------------------|--------------|
| Latent period                                                               | lognormal(4.5, 1.5)     | [24, 58]     |
| Infectious period for asymptomatic and mild cases                           | lognormal(8, 2)         | [24, 59]     |
| Duration of presymptomatic period                                           | lognormal(1.1, 0.9)     | [24, 60]     |
| Length of time from symptom onset to hospitalization                        | lognormal(6.6, 4.9)     | [24, 60, 61] |
| Length of time from hospitalization to critically ill                       | lognormal(1.5, 1)       | [24, 61, 62] |
| Length of time from critically ill to death                                 | lognormal(10.7, 4.8)    | [24, 63]     |
| Time from onset of symptoms to recovery for severe and critically ill cases | lognormal(18.1, 6.3)    | [24, 63]     |
| Age-stratified mortality rates                                              | varied by age           | [24, 64, 65] |
| Age-stratified probability of developing symptoms                           | Table S3                | [24, 63, 66] |
| Fraction of symptomatic infections <15 year old                             | 0.25                    | [67]         |
| Fraction of symptomatic infections ≥15 year old                             | 0.6                     | [50, 68, 69] |
| Antiviral effect on viral transmission, AVT                                 | 25, 50, 75, 100         | assumed      |
| Antiviral effect on hospitalization, AVH,                                   | 50 or 80                | [70, 71]     |

Table S2: Vaccine effectiveness values used in the model during the Delta and the Omicron waves. For the Delta wave, vaccine effectiveness assumes full coverage. For the Omicron wave, we assumed that boosted vaccinated individuals will get the same protection as that given by full coverage during the Delta wave.

| Parameter                                                  | Delta | Omicron (full coverage) | Omicron (boosted) | References |
|------------------------------------------------------------|-------|-------------------------|-------------------|------------|
| Vaccine efficacy against infection, $VE_{SUS}$             | 59.6  | 10                      | 59.6              | [72–74]    |
| Vaccine efficacy against symptomatic infection, $VE_{DIS}$ | 67.5  | 0.15                    | 67.5              | [72, 74]   |
| Vaccine efficacy against Hospitalization, $VE_{HOSP}$      | 87.65 | 0.52                    | 87.65             | [72, 74]   |

Table S3: Age-specific parameters for disease progression.

| Parameter                       | 0-9     | 10-19   | 20-29   | 30-39   | 40-49   | 50-59   | 60-69   | 70-79   | 80-89   | 90+    |
|---------------------------------|---------|---------|---------|---------|---------|---------|---------|---------|---------|--------|
| Probability of severe disease   | 0.0005  | 0.00165 | 0.0072  | 0.0208  | 0.0343  | 0.0765  | 0.1328  | 0.20655 | 0.2457  | 0.2457 |
| Probability of critical disease | 0.00003 | 0.00008 | 0.00036 | 0.00104 | 0.00216 | 0.00933 | 0.03639 | 0.08923 | 0.1742  | 0.1742 |
| Probability of death            | 0.00002 | 0.00002 | 0.0001  | 0.00032 | 0.00098 | 0.00265 | 0.00766 | 0.02439 | 0.08292 | 0.1619 |

Table S4: Demographic distribution of the adult population

| Location                       | Kenya | Mexico | US  | Belgium |
|--------------------------------|-------|--------|-----|---------|
| Percentage of adults $\geq 18$ | 100   | 100    | 100 | 100     |
| Percentage of adults $\geq 30$ | 44    | 59     | 70  | 74      |
| Percentage of adults $\geq 50$ | 13    | 26     | 40  | 44      |
| Percentage of adults $\geq 65$ | 3     | 9      | 19  | 22      |

Table S5: Vaccine distribution in Belgium (values taken from [55, 56]). As of January 3rd, certain groups (e.g. children who just got vaccinated) in Belgium were considered “highly protected” and were given the vaccine effectiveness of the boosted vaccinated individuals in the model.

| Age group | Delta wave (full dosage) | Omicron wave (full dosage) | Omicron (highly protected) |
|-----------|--------------------------|----------------------------|----------------------------|
| 12-15     | 0.6975                   | 0.0194                     | 0.74                       |
| 16-17     | 0.7886                   | 0.0351                     | 0.81                       |
| 18-24     | 0.7924                   | 0.0805                     | 0.76                       |
| 25-34     | 0.7884                   | 0.0809                     | 0.75                       |
| 35-44     | 0.8369                   | 0.1257                     | 0.74                       |
| 45-54     | 0.887                    | 0.2148                     | 0.69                       |
| 55-64     | 0.9154                   | 0.1769                     | 0.75                       |
| 65-74     | 0.9317                   | 0.09                       | 0.85                       |
| 75-85     | 0.9378                   | 0.0753                     | 0.87                       |
| $\geq 85$ | 0.9139                   | 0.11                       | 0.81                       |

Table S6: Vaccine distribution in US (values taken from [54, 56]). As of January 3rd, children under 18 years old were considered “highly protected” and were given the vaccine effectiveness of the boosted vaccinated individuals in the model.

| Age group | Delta wave (full dosage) | Omicron wave (full dosage) | Omicron (highly protected) |
|-----------|--------------------------|----------------------------|----------------------------|
| 5-11      | -                        | -                          | 0.156                      |
| 12-15     | 0.446                    | -                          | 0.536                      |
| 16-17     | 0.524                    | -                          | 0.536                      |
| 18-24     | 0.528                    | 0.389                      | 0.20                       |
| 25-39     | 0.57                     | 0.417                      | 0.215                      |
| 40-49     | 0.658                    | 0.471                      | 0.243                      |
| 50-64     | 0.737                    | 0.431                      | 0.353                      |
| 65-74     | 0.86                     | 0.36                       | 0.539                      |
| $\geq 75$ | 0.809                    | 0.338                      | 0.506                      |

Table S7: Vaccine distribution in Mexico (values taken from [53, 56]). As of January 3rd, we found no data on boosted individuals in Mexico, so we did not consider boosted individuals in Mexico [56].

| Age group | Delta wave (full dosage) | Omicron wave (full dosage) |
|-----------|--------------------------|----------------------------|
| 18-39     | 0.493                    | 0.83                       |
| 40-49     | 0.735                    | 0.735                      |
| 50-59     | 0.785                    | 0.785                      |
| 60        | 0.824                    | 0.824                      |

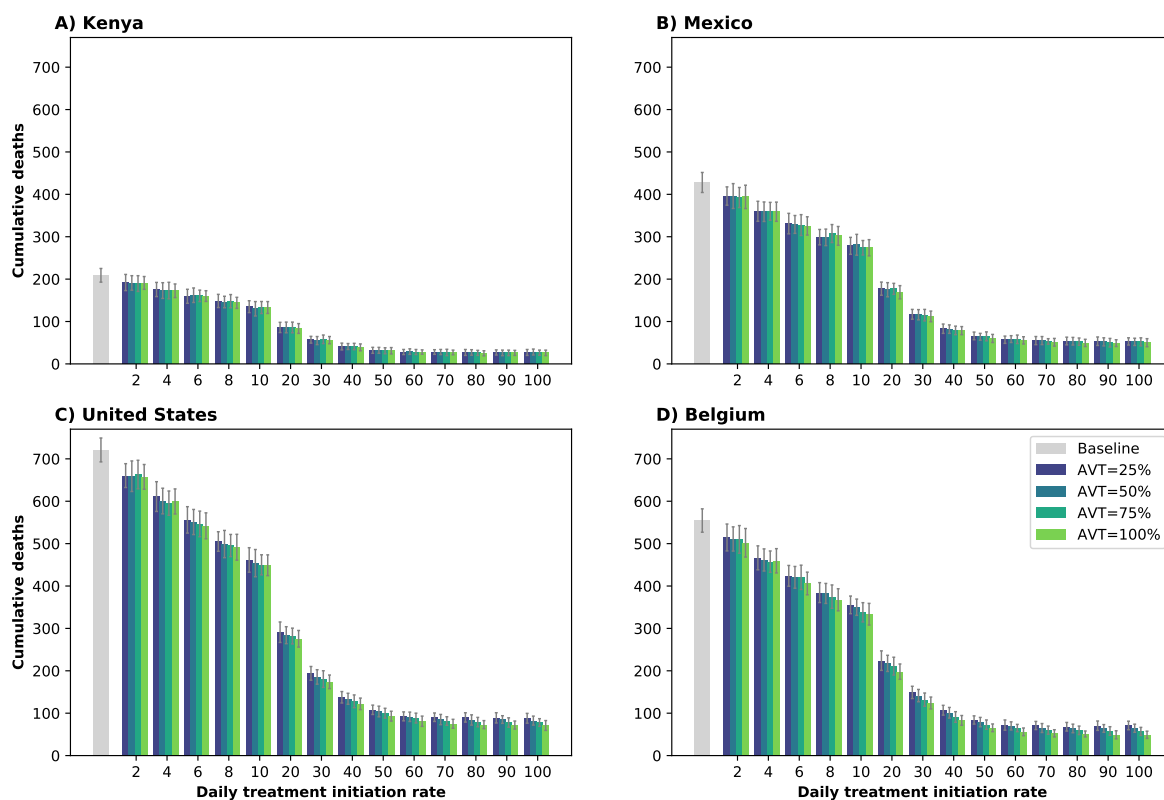

Figure S1: Cumulative deaths over next 6 months in A) Kenya, B) Mexico, C) United States and D) Belgium. Here, we assumed an epidemic wave with parameters similar to those of the Omicron epidemic wave (transmissibility, vaccine effectiveness, and vaccination coverage). For each country, the colors represent four possible values of AVT (25, 50, 75 or 100% reduction in viral transmission in treated symptomatic individuals) and a daily treatment initiation rate (DTIR) of 2-100% of adult symptomatic individuals within the first 5 days of symptoms. Gray bars represent baseline cumulative deaths in absence of antiviral treatment.

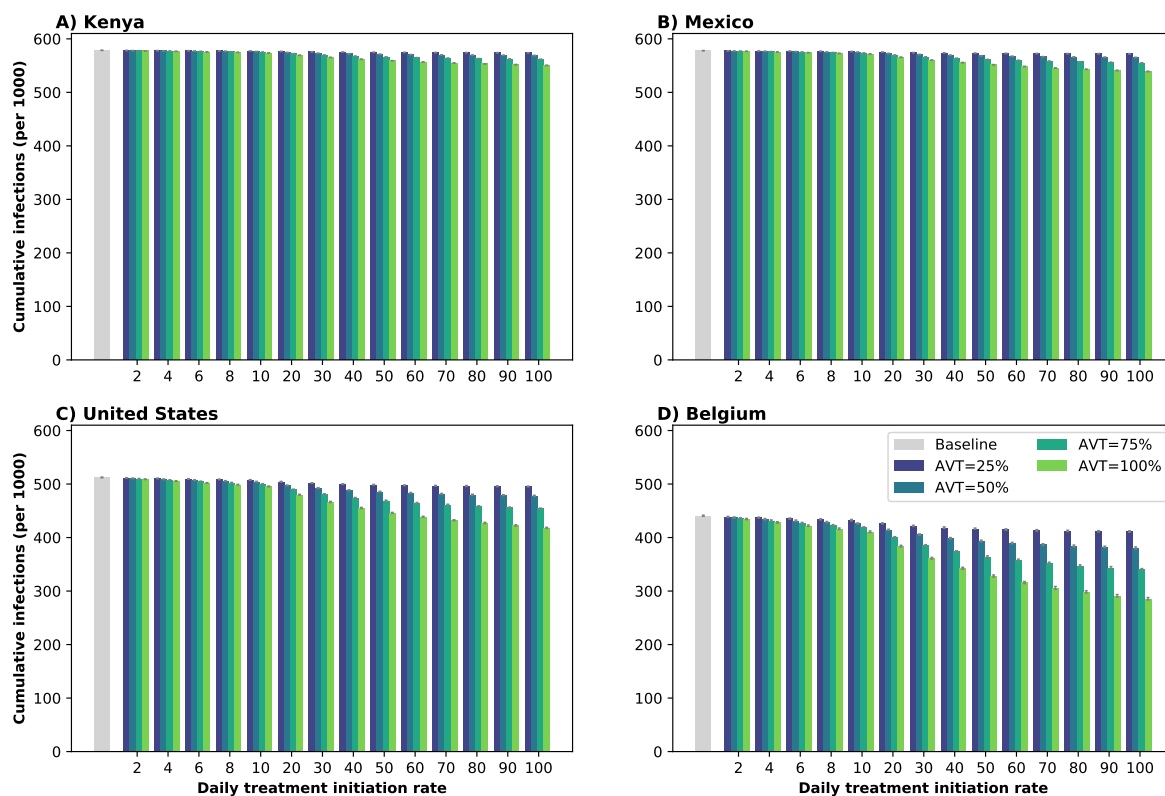

Figure S2: Cumulative infections over next 6 months for A) Kenya, B) Mexico, C) United States and D) Belgium. Here, we assumed an epidemic wave with parameters similar to those of the Omicron epidemic wave (transmissibility, vaccine effectiveness, and vaccination coverage). For each country, the colors represent four possible values of AVT (25, 50, 75 or 100% reduction in viral transmission in treated symptomatic individuals) and a daily treatment initiation rate (DTIR) of 2-100% of adult symptomatic individuals within the first 5 days of symptoms. Gray bars represent baseline cumulative infections in absence of antiviral treatment.

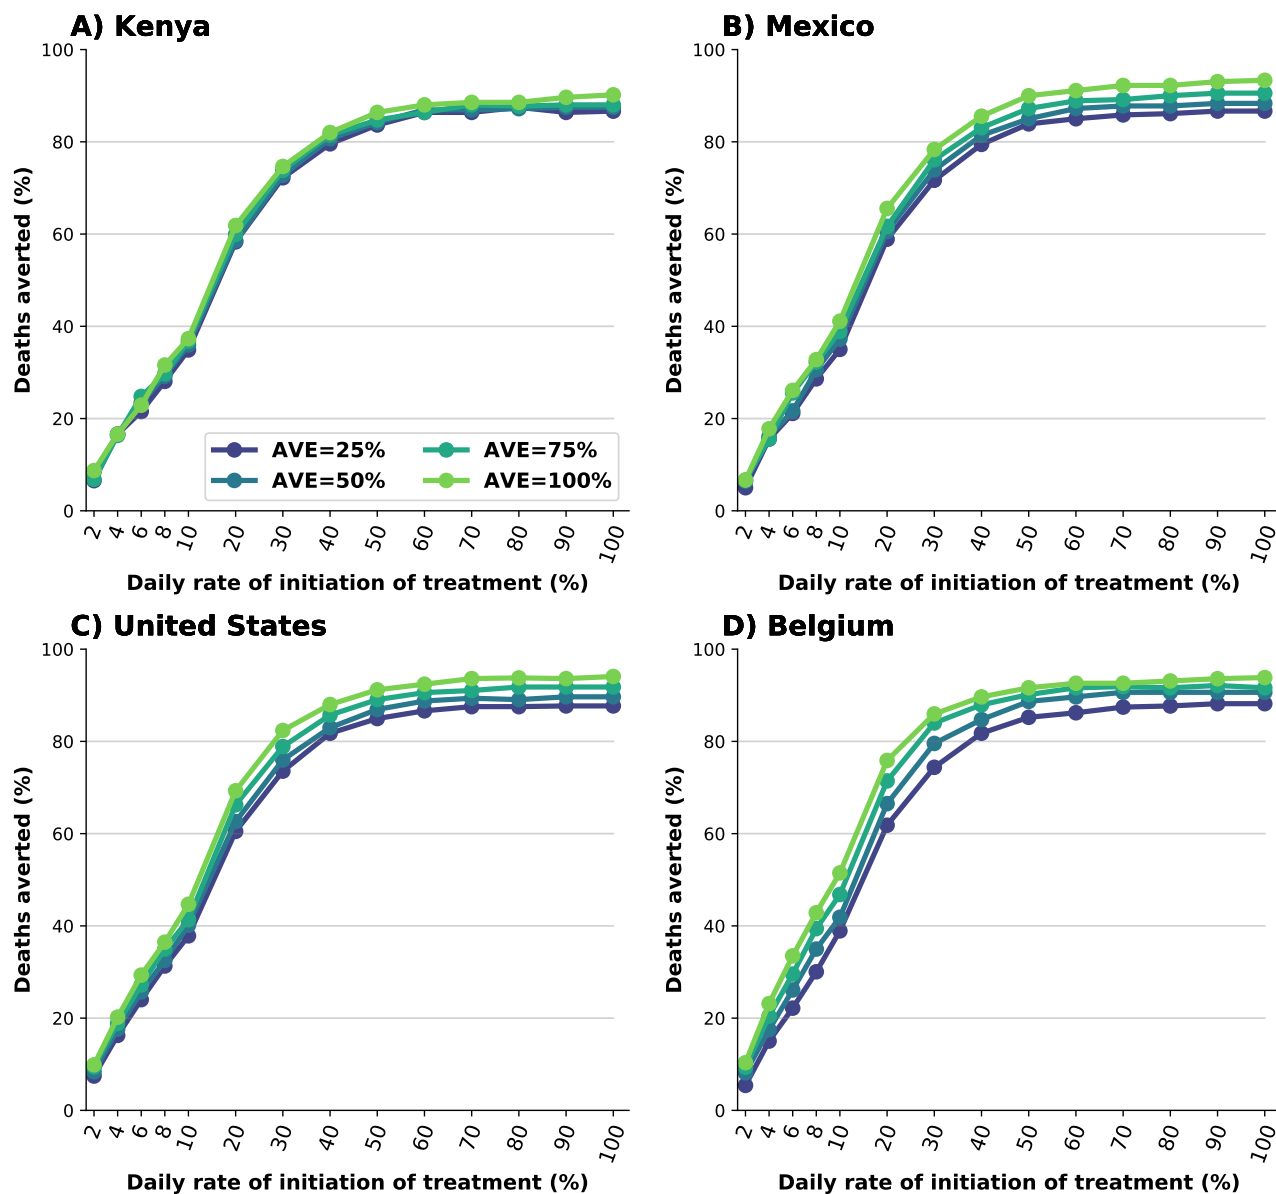

Figure S3: Percentage of deaths averted (compared to a baseline of no antiviral treatment) for A) Kenya, B) Mexico, C) United States and D) Belgium. Here, we assumed an epidemic wave with parameters similar to those of the Delta epidemic wave (transmissibility, vaccine effectiveness, and vaccination coverage). For each country, the colors represent four possible values of AVT (25, 50, 75 or 100% reduction in viral transmission in treated symptomatic individuals) and a daily treatment initiation rate (DTIR) of 2-100% of adult symptomatic individuals within the first 5 days of symptoms.

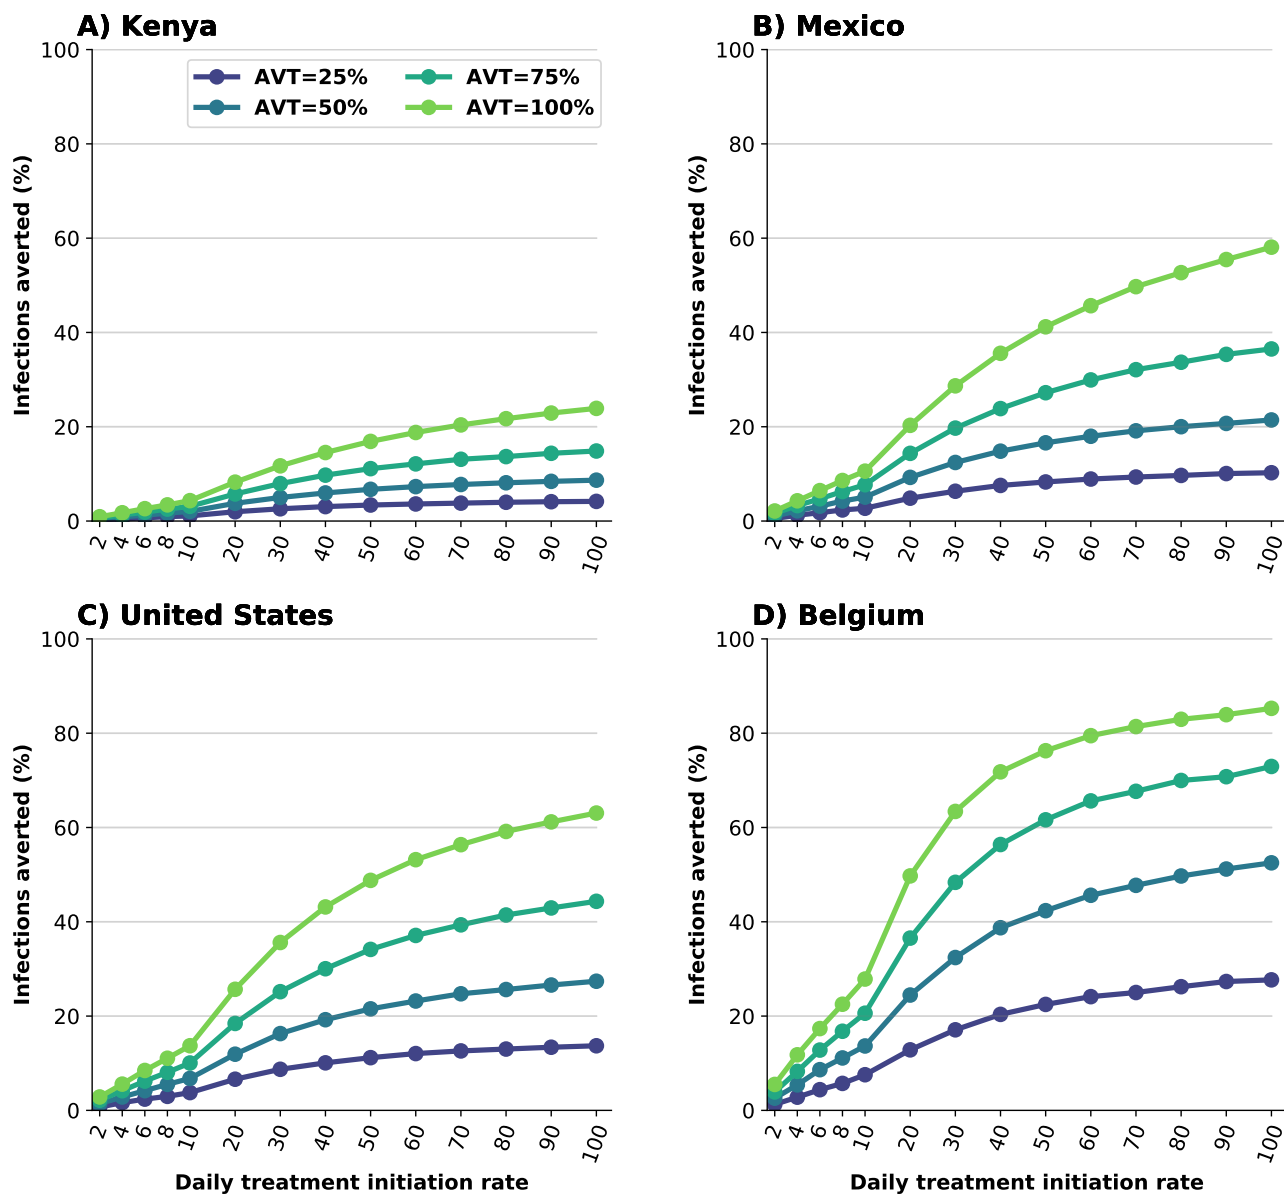

Figure S4: Percentage of infections averted (compared to a baseline of no antiviral treatment) for A) Kenya, B) Mexico, C) United States and D) Belgium. Here, we assumed an epidemic wave with parameters similar to those of the Delta epidemic wave (transmissibility, vaccine effectiveness, and vaccination coverage). For each country, the colors represent four possible values of AVT (25, 50, 75 or 100% reduction in viral transmission in treated symptomatic individuals) and a daily treatment initiation rate (DTIR) of 2-100% of adult symptomatic individuals within the first 5 days of symptoms.

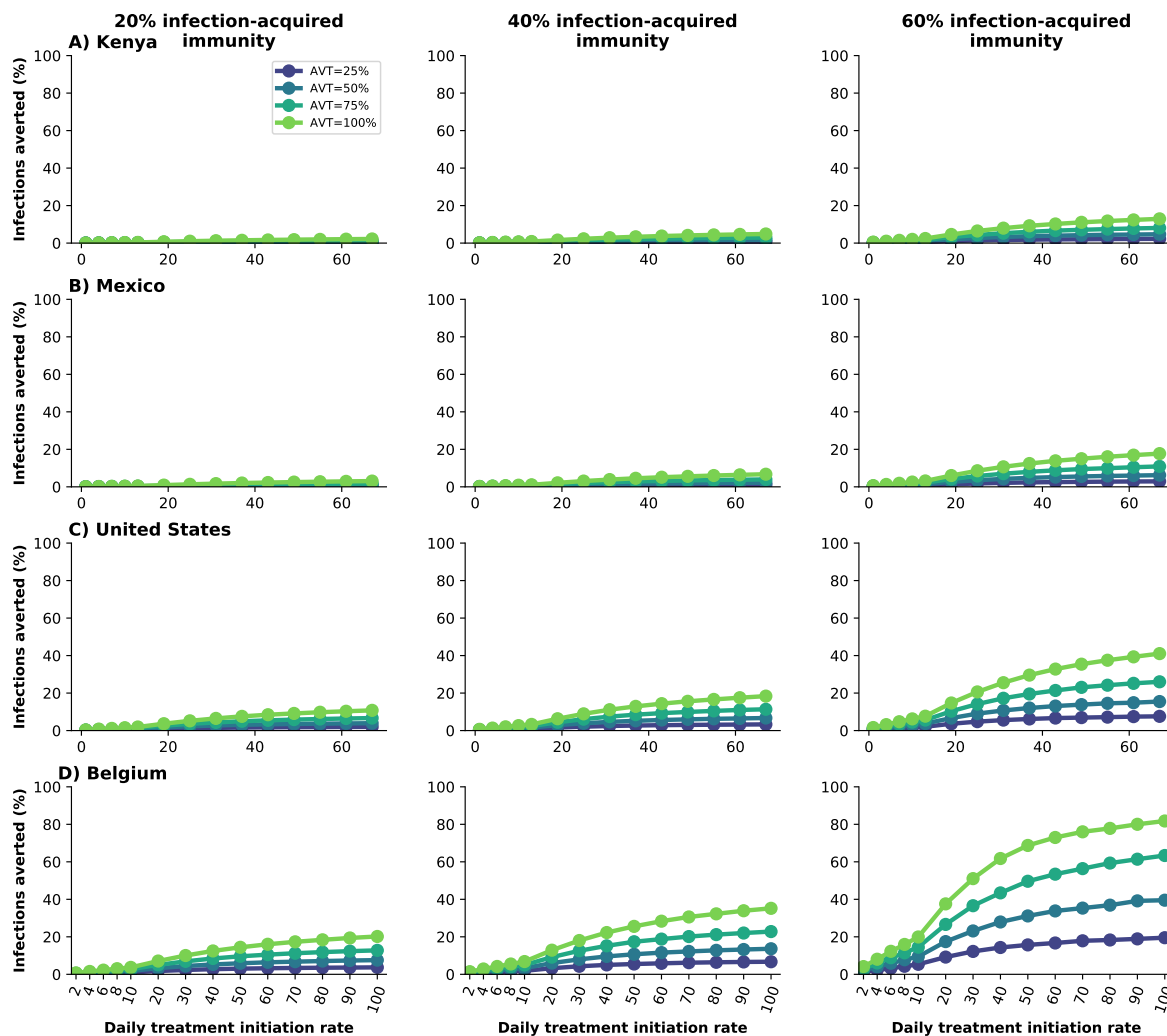

Figure S5: Percentage of deaths averted for A) Kenya, B) Mexico, C) United States and D) Belgium assuming 20 (left), 40 (middle) or 60% (right) of the population has been previously infected and is currently immune. For each country, the colors represent four possible values of AVT (25, 50, 75 or 100% reduction in viral transmission in treated symptomatic individuals) and a daily treatment initiation rate (DTIR) of 2-100% of adult symptomatic individuals within the first 5 days of symptoms.

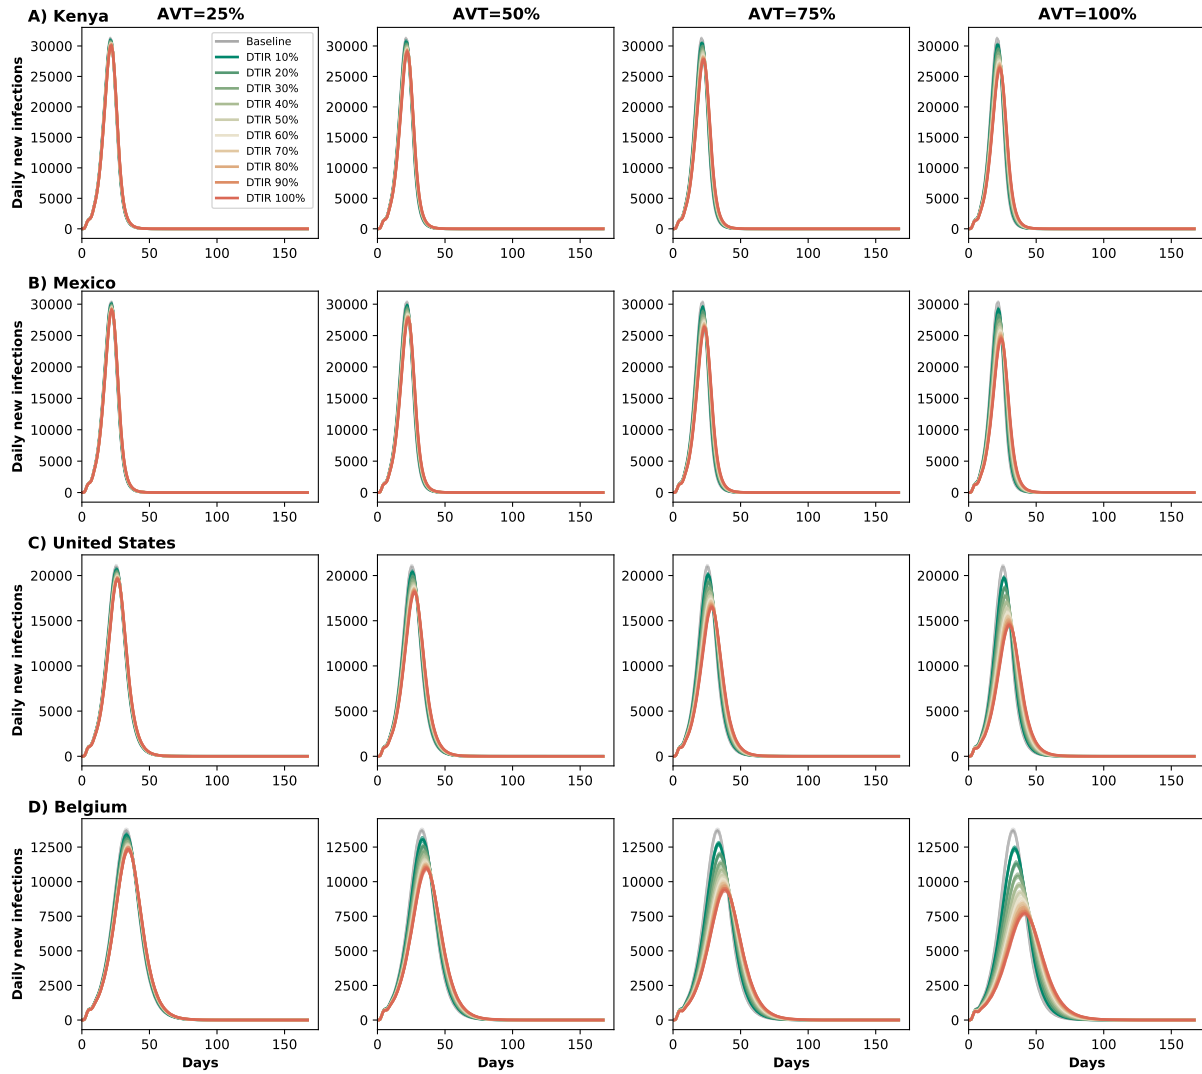

Figure S6: Daily new infections assuming no antiviral treatment (Baseline) or assuming a daily treatment initiation rate of of 10-100% of eligible symptomatic individuals in A) Kenya, B) Mexico, C) United States and D) Belgium assuming 20% of the population has been previously infected and is now recovered. For each location, each column represents a different value of AVT (25, 50, 75 or 100% reduction in viral transmission in treated symptomatic individuals).



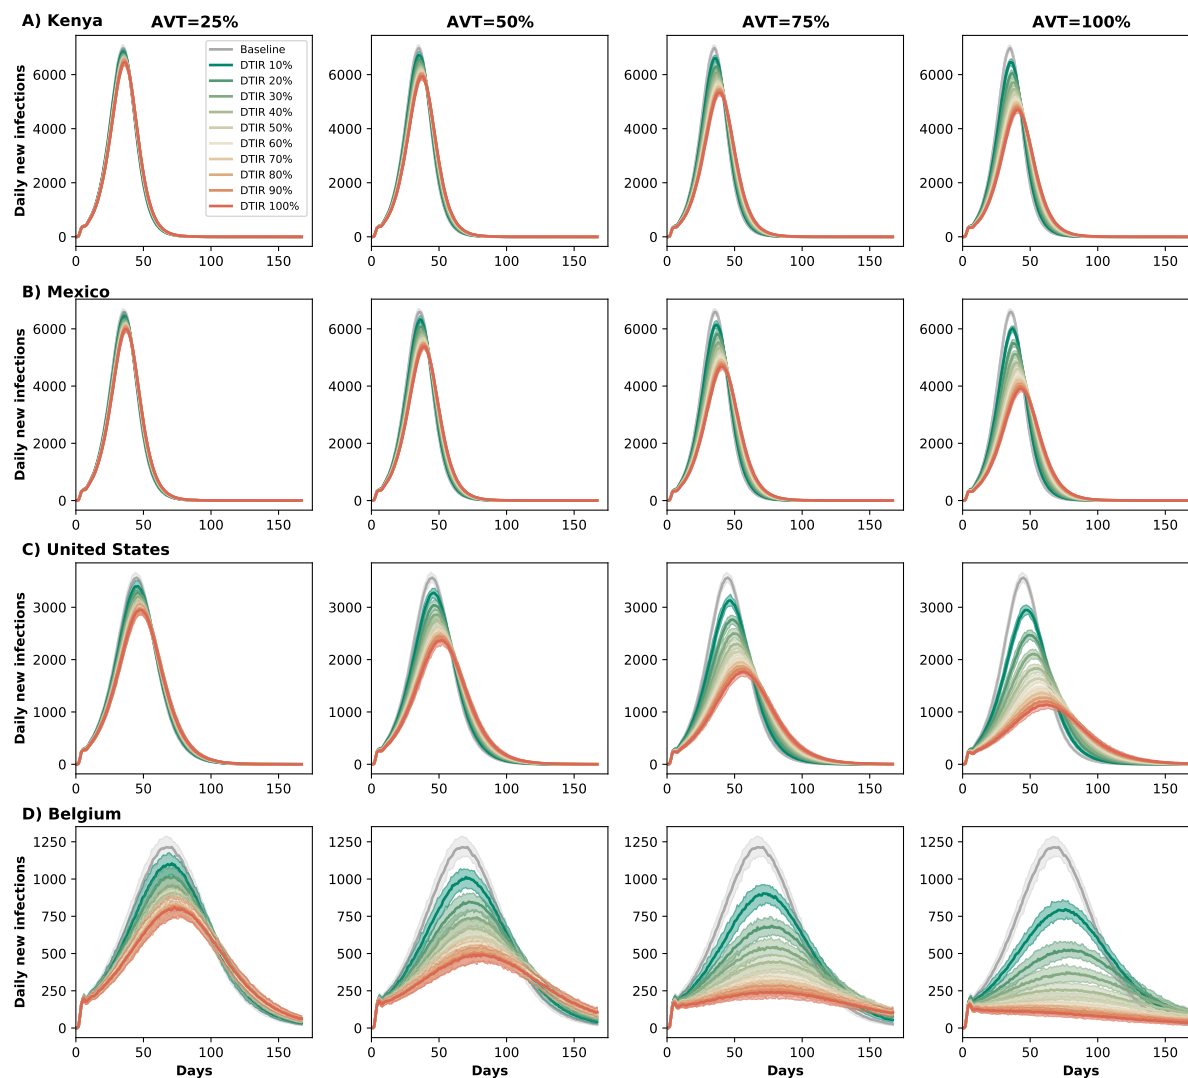

Figure S7: Daily new infections assuming no antiviral treatment (Baseline) or assuming a daily treatment initiation rate of of 10-100% of eligible symptomatic individuals in A) Kenya, B) Mexico, C) United States and D) Belgium assuming 60% of the population has been previously infected and is now recovered. For each location, each column represents a different value of AVT 25, 50, 75 or 100% reduction in viral transmission in treated symptomatic individuals).

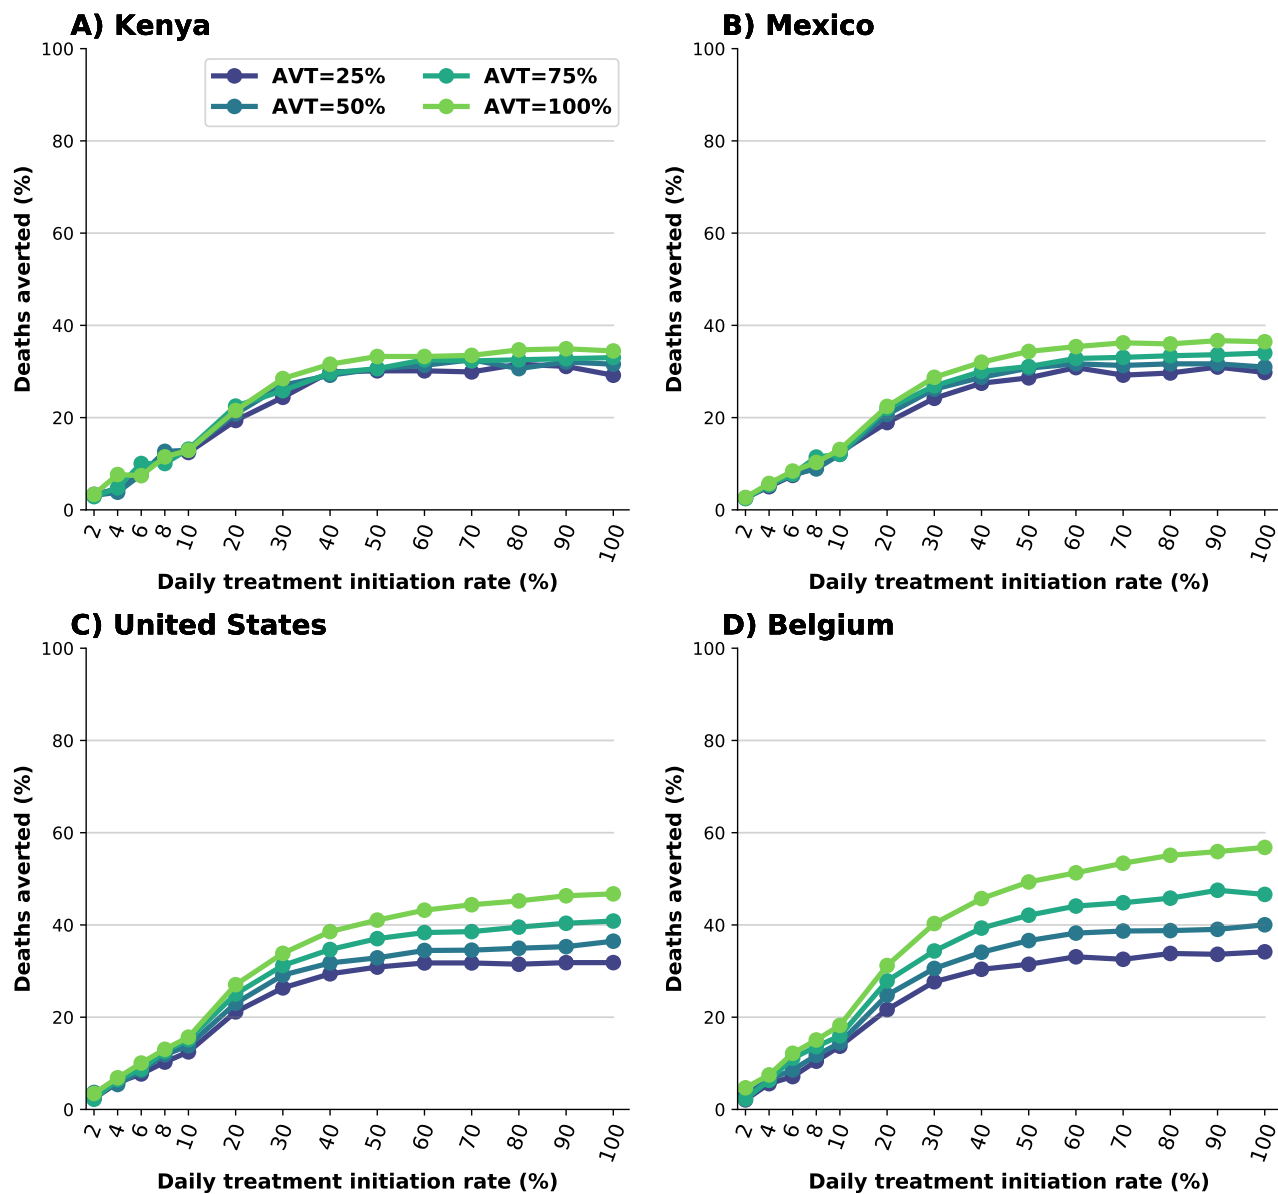

Figure S8: Percentage of deaths averted (compared to a baseline of no antiviral treatment) for A) Kenya, B) Mexico, C) United States and D) Belgium assuming antiviral treatment would reduce hospitalizations by 30%. Here, we assumed an epidemic wave with parameters similar to those of the Delta epidemic wave (transmissibility, vaccine effectiveness, and vaccination coverage). For each country, the colors represent four possible values of AVT (25, 50, 75 or 100% reduction in viral transmission in treated symptomatic individuals) and a daily treatment initiation rate (DTIR) of 2-100% of adult symptomatic individuals within the first 5 days of symptoms.

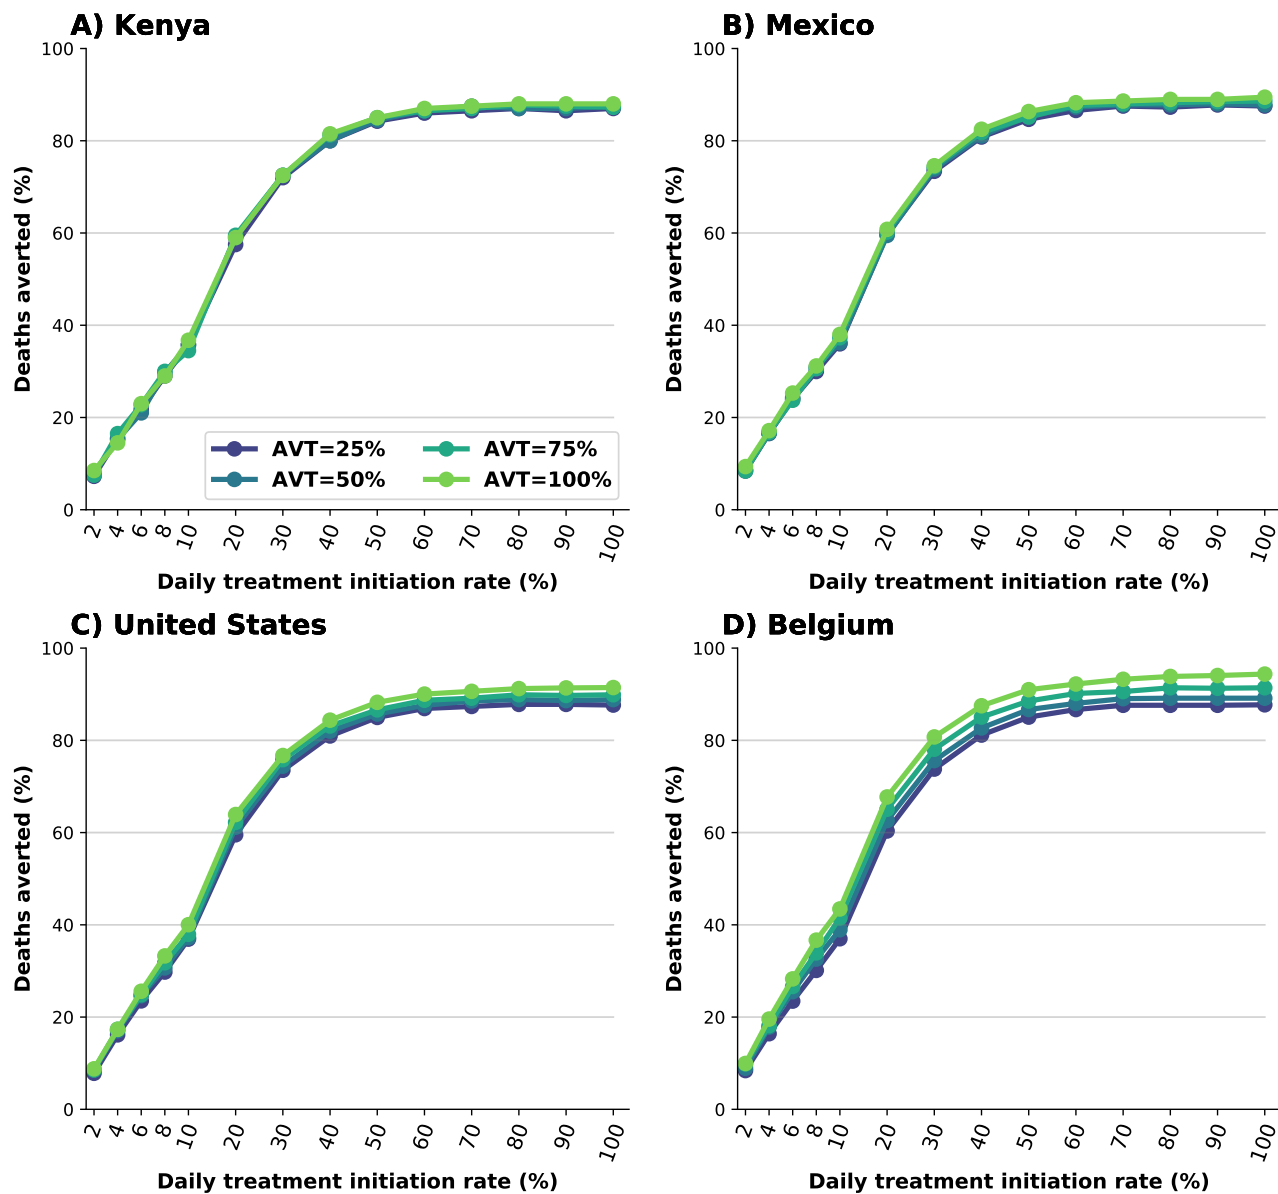

Figure S9: Percentage of deaths averted (compared to a baseline of no antiviral treatment) for A) Kenya, B) Mexico, C) United States and D) Belgium assuming asymptomatic infections are 50% less infectious. For each country, the colors represent four possible values of AVT (25, 50, 75 or 100% reduction in viral transmission in treated symptomatic individuals) and a daily treatment initiation rate (DTIR) of 2-100% of adult symptomatic individuals within the first 5 days of symptoms.

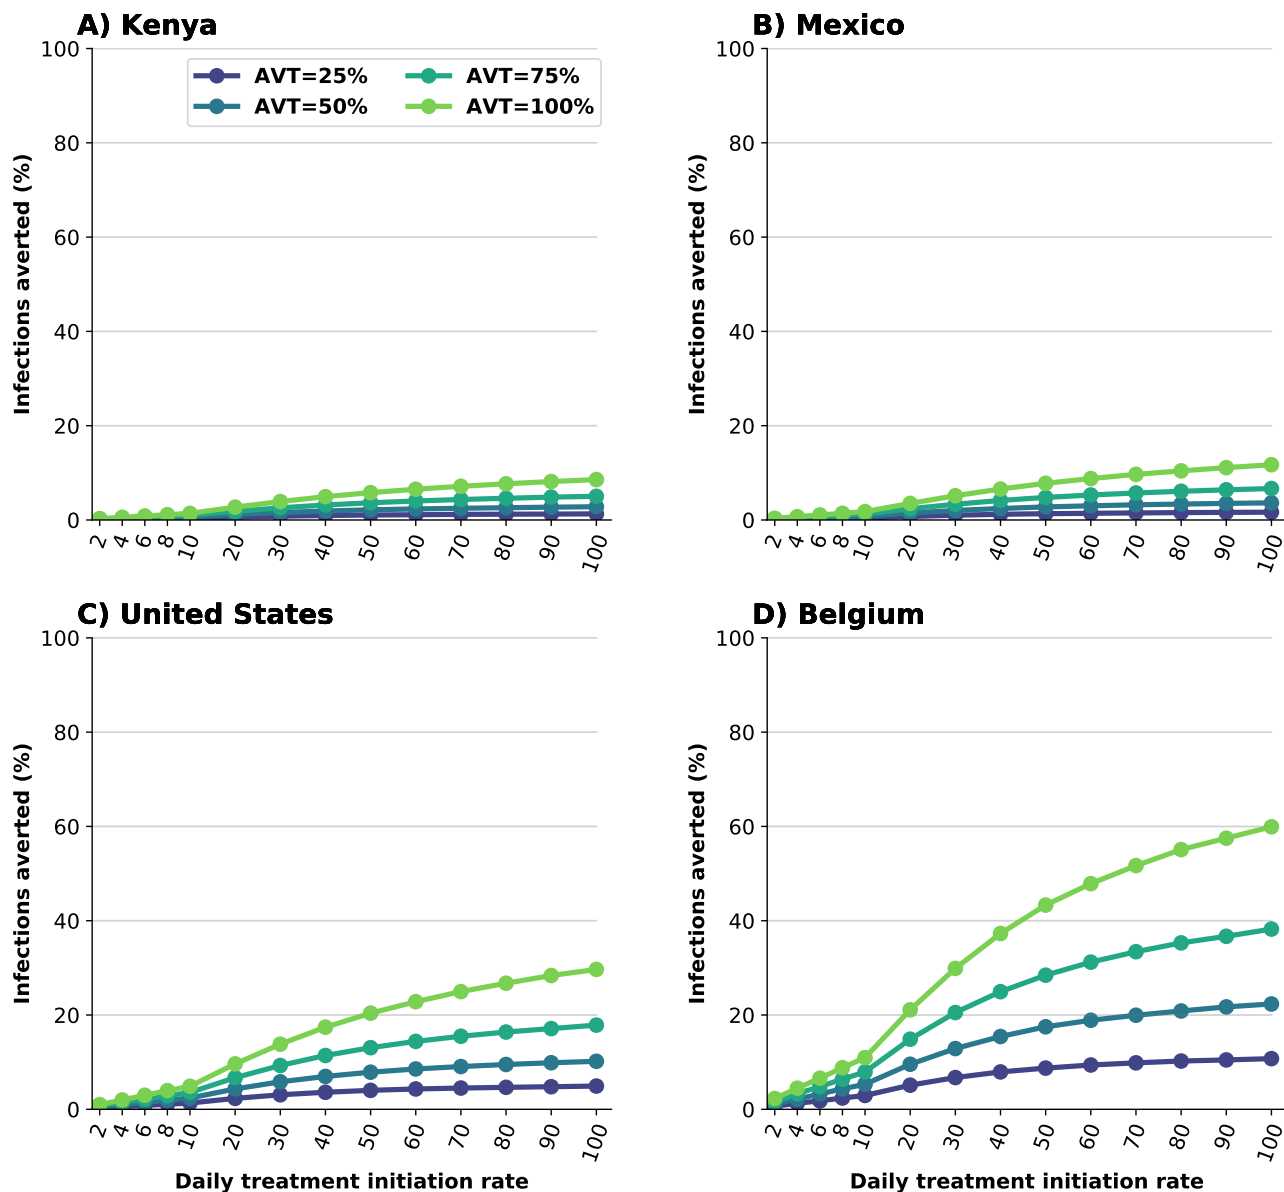

Figure S10: Percentage of infections averted (compared to a baseline of no antiviral treatment) for A) Kenya, B) Mexico, C) United States and D) Belgium assuming asymptomatic infections are 50% less infectious. For each country, the colors represent four possible values of AVT (25, 50, 75 or 100% reduction in viral transmission in treated symptomatic individuals) and a daily treatment initiation rate (DTIR) of 2-100% of adult symptomatic individuals within the first 5 days of symptoms.
